# Supplementary material
Source: PubMed Central journal article supplement (PMC4972259)
Supplement: supp_pp.15.01707_PP2015-01707R2_Supplemental_Figure_1.pdf [file supp_pp.15.01707_PP2015-01707R2_Supplemental_Figure_1.pdf]

# Supplemental Figure 1

A

B

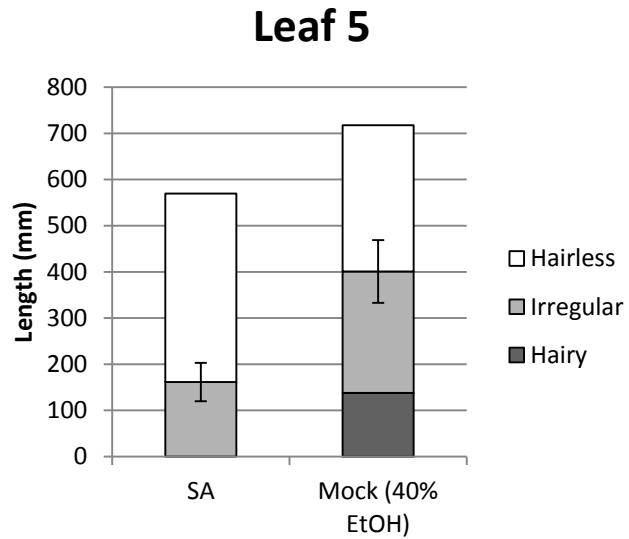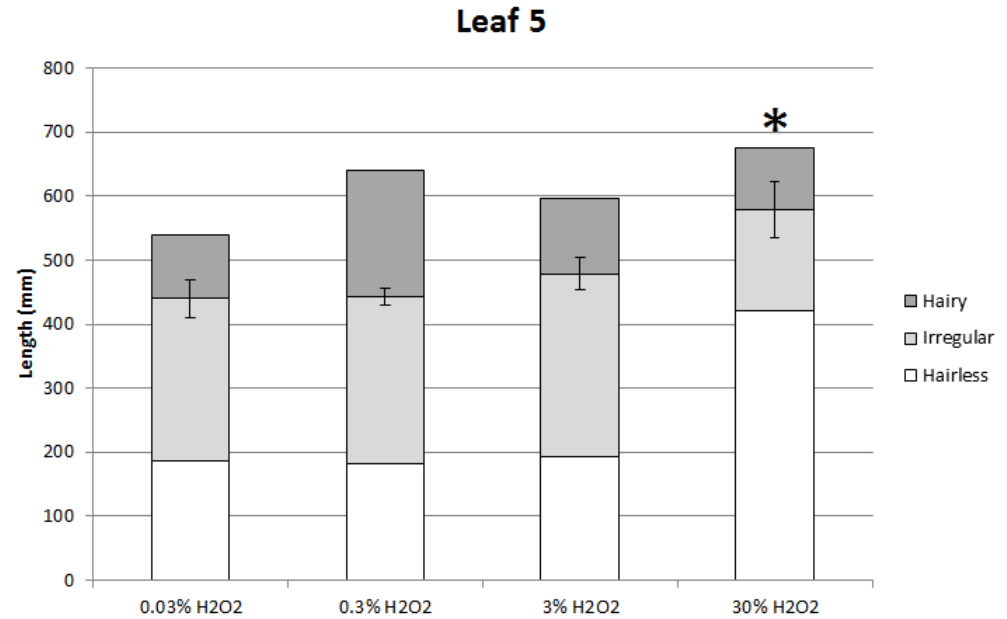

**Supplemental Figure 1.** Treatment of seedlings with A. SA or B. hydrogen peroxide. Error bars represent standard deviation of irregular sector. \* indicates significant difference in percentage of leaf hairless compared to all other treatments at  $p < 0.05$ , Student's t-test.
